# Supplementary material for: Abnormal Degree Centrality in the Right Inferior Frontal Gyrus During Urine Holding in Children With Primary Monosymptomatic Nocturnal Enuresis
Source: Research Square preprint supplement (doi:10.21203/rs.3.rs-153738/v1), 2021-02-08
Supplement: Supplementary file 1 [file faa76a8fdacc6710a10a2c4d.docx]

**Abnormal degree centrality in the right inferior frontal gyrus during urine holding in children with primary monosymptomatic nocturnal enuresis**

**Mengxing Wang,1 Xiangyu Zheng,3 Zhaoxia Qin,2 Jun Ma,3* Xiaoxia Du,2***

1 College of Medical imaging, Shanghai University of Medicine and Health Sciences, Shanghai 201318, China

2 Shanghai Key Laboratory of Magnetic Resonance and Department of Physics, School of Physics and Electronic Science, East China Normal University, Shanghai 200062, China

3Department of Developmental and Behavioral Pediatrics, Shanghai Children’s Medical Center, Shanghai Jiao Tong University School of Medicine, Shanghai 200127, China

*Corresponding author:

Jun Ma, Shanghai Children’s Medical Center, 1678 Dong-Fang Road, 200127 Shanghai, People’s Republic of China; Email: majun@shsmu.edu.cn (J. Ma) Or Xiaoxia Du, East China Normal University, 3663 North Zhong-Shan Road, 200062 Shanghai, People’s Republic of China; Email: xxdu@phy.ecnu.edu.cn (X.X. Du).

**The interview for enuretic children’s parents.**

1. Has your child wet the bed at night involuntarily after 5 years old?
2. Was the condition suspended for more than six months?
3. Was the condition caused by any related disease or drug?
4. How often has your child wet the bed for recent three months?
5. Could the child wake up for voluntary voiding?
6. Is the child right-handed?
7. Has your child been diagnosed with any neurological or psychiatric diseases?
8. Has your child got headache or dizzy recently?
9. Has your child wet pants during the daytime recently?

**The interview for healthy children’s parents.**

1. Has your child wet the bed at night involuntarily after 5 years old?
2. Is the child right-handed?
3. Has your child been diagnosed with any neurological or psychiatric diseases?
4. Has your child got headache or dizzy recently?
5. Has your child wet pants during the daytime recently?
